# Supplementary material
Source: PubMed Central journal article supplement (PMC8297491)
Supplement: Appendix_A_8_3_272.pdf [file Appendix_A_8_3_272.pdf]

## Appendix A.

### Personal Experience With Diabetes

1. Have you ever been diagnosed with type 1 diabetes (T1D)?
  - a. Yes
    - i. Conditional -- If yes:
      1. Have you ever used a continuous glucose monitor, such as the Dexcom, Freestyle Libre, Senseonics Eversense, or Medtronic Guardian?
        - a. Yes
        - b. No
        - c. Unsure
      2. Have you ever used an insulin pump?
        - a. Yes
        - b. No
        - c. Unsure
  - a. Yes
    - i. Conditional -- If yes:
      1. Have you ever used a continuous glucose monitor, such as the Dexcom, Freestyle Libre, Senseonics Eversense, or Medtronic Guardian?
        - a. Yes
        - b. No
        - c. Unsure
      2. Have you ever used an insulin pump?
        - a. Yes
        - b. No
        - c. Unsure
3. Have you ever been diagnosed with gestational diabetes (GD)?
  - a. Yes
    - i. Conditional -- If yes:
      1. Have you ever used a continuous glucose monitor, such as the Dexcom, Freestyle Libre, Senseonics Eversense, or Medtronic Guardian?
        - a. Yes
        - b. No
        - c. Unsure
      2. Have you ever used an insulin pump?
        - a. Yes
        - b. No
        - c. Unsure
4. Have any of your family or close friends used a continuous glucose monitor, such as the Dexcom, Freestyle Libre, Senseonics Eversense, or Medtronic Guardian?
  - a. Yes
  - b. No
  - c. Unsure
5. Have any of your family or close friends used an insulin pump?
  - a. Yes
  - b. No
  - c. Unsure

### Advanced Artificial Pancreas Technology

6. Are you familiar with emerging closed-loop insulin pump (“artificial pancreas”) technology?
  - a. Yes
  - b. No
  - c. Unsure

Please consider a hypothetical new diabetes management system:

After entering only the patient’s weight, it automatically adjusts insulin delivery to keep blood sugars at a pre-defined target level. It reduces both hypoglycemia and hyperglycemia, achieving a hemoglobin A1c of approximately 6.8%.

7. I feel that there are advantages to patients being able to get such a system through their primary care provider.
  - a. Strongly disagree
  - b. Disagree
  - c. Agree
  - d. Strongly agree
8. I would consider ordering/prescribing such a system for my patients with T1D.
  - a. If “Yes” – move to next question
  - b. If “No”
    - i. If the manufacturer provided patient/parent training on device use, would you consider prescribing this to patients yourself?
      1. Yes
      2. No
9. I would consider ordering/prescribing such a system for my patients with T2D.
  - a. If “Yes” – move to next question
  - b. If “No”
    - ii. If the manufacturer provided patient/parent training on device use, would you consider prescribing this to patients yourself?
      1. Yes
      2. No
10. I would consider ordering/prescribing such a system for my patients with GD.
  - a. If “Yes” – move to next question
  - b. If “No”
    - iii. If the manufacturer provided patient/parent training on device use, would you consider prescribing this to patients yourself?
      1. Yes
      2. No
11. I feel that ordering/prescribing such a system would require consultation with an endocrinologist.
  - a. Yes
    - iv. Conditional: If yes – please elaborate
  - b. No
12. Do you see any potential challenges with emerging closed-loop insulin pump (“artificial pancreas”) technology being prescribed by primary care providers?
  - a. Yes
    - v. Conditional: If yes – please elaborate
  - b. No
13. Do you see any benefits to being able to prescribe emerging closed-loop insulin pump (“artificial pancreas”) technology over a specialist?
  - a. Yes
    - vi. Conditional: If yes – please elaborate
  - b. No
    - a. Conditional: If no – please elaborate

### Patient Population

14. Please estimate how many patients in your continuity panel have T1D
  - a. 0
  - b. 1-5
  - c. 6-10
  - d. 11-15
  - e. 16-20
  - f. 21-25
  - g. Greater than 25
15. Please estimate how many patients with T1D you provide primary DIABETES care for.
  - a. 0
  - b. 1-5
  - c. 6-10
  - d. 11-15
  - e. 16-20
  - f. 21-25
  - g. Greater than 25
16. Please estimate how many patients in your continuity panel have T2D.
  - a. 0
  - b. 1-10
  - c. 11-25
  - d. 25-50
  - e. >50
17. Please estimate how many patients with T2D you provide primary DIABETES care for.
  - a. 0
  - b. 1-10
  - c. 11-25
  - d. 25-50
  - e. >50
18. What percentage of your patients with T2D take insulin?
  - a. 0%
  - b. 1-10%
  - c. 11-20%
  - d. 21-30%
  - e. 31-40%
  - f. 41-50%
  - g. >50%
19. Please estimate how many patients in your continuity panel have GD.
  - a. 0
  - b. 1-5
  - c. 6-10
  - d. 11-15
  - e. 16-20
  - f. 21-25
  - g. >25
20. Please estimate how many patients with GD you provide primary DIABETES care for.
  - a. 0
  - b. 1-5
  - c. 6-10
  - d. 11-15
  - e. 16-20
  - f. 21-25
  - g. >25
21. What percentage of your patients with GD take insulin?
  - a. 0%
  - b. 1-10%
  - c. 11-20%
  - d. 21-30%
  - e. 31-40%
  - f. 41-50%
  - g. >50%
  - h. N/A (I do not have patients with GD)
22. Does a Certified Diabetes Educator (CDE) see patients at your practice site?
  - a. Yes
  - b. No
  - c. Unsure
23. Does a Registered Dietician (RD) see patients at your practice site?
  - a. Yes
  - b. No
  - c. Unsure
24. How familiar are you with continuous glucose monitoring (CGM) systems, such as the Dexcom G6, Freestyle Libre, and Senseonics Eversense?
  - a. Very familiar
  - b. Somewhat familiar
  - c. Somewhat unfamiliar
  - d. Very unfamiliar
25. Do you have any patients with diabetes using continuous glucose monitoring (CGM) systems?
  - a. Yes
  - b. No
  - c. Unsure
26. Does your practice perform CGM training on site?
  - a. Yes
  - b. No
  - c. Unsure
27. Which of the following insulin delivery methods are used among your patients with diabetes? (Please select all that apply)
  - a. Syringes/insulin vials
  - b. Insulin pens
  - c. Insulin pumps
  - d. Inhaled insulin
  - e. N/A (I do not have any patients that take insulin)
28. How comfortable are you initiating insulin for T2D via **injections** (insulin pens or insulin syringes)?
  - a. Very comfortable
  - b. Somewhat comfortable
  - c. Somewhat uncomfortable
  - d. Very uncomfortable
29. How comfortable are you adjusting insulin for T2D via **injections** (insulin pens or insulin syringes)?
  - a. Very comfortable
  - b. Somewhat comfortable
  - c. Somewhat uncomfortable
  - d. Very uncomfortable
30. How comfortable are you initiating insulin for T2D via **insulin pumps**?
  - a. Very comfortable
  - b. Somewhat comfortable
  - c. Somewhat uncomfortable
  - d. Very uncomfortable
31. How comfortable are you adjusting insulin for T2D via **insulin pumps**?
  - a. Very comfortable
  - b. Somewhat comfortable
  - c. Somewhat uncomfortable
  - d. Very uncomfortable

END OF STUDY INSTRUMENT

### SUPPLEMENTAL SURVEY SECTION

#### Provider Demographics

32. What is your age? \_\_\_\_\_ (years)
33. What is your gender?
  - a. Male
  - b. Female
  - c. Other: \_\_\_\_\_
  - d. Prefer not to answer
34. What is your position?
  - a. Attending Physician
  - b. Resident Physician
  - c. Nurse Practitioner
  - d. Physician Assistant
  - e. Other: \_\_\_\_\_
35. How long have you been practicing (after completion of training)?
  - a. I am still in training
  - b. 0-5 years
  - c. 5-10 years
  - d. 10-15 years
  - e. 15-20 years
  - f. >20 years
36. Please enter the location of your practice:
  - a. City:
  - b. State:
37. What is the setting of your practice?
  - a. Urban
  - b. City suburb
  - c. Town
  - d. Rural
38. Is your practice (Please select all that apply):
  - a. Solo
  - b. Partner
  - c. Single specialty
  - d. Multispecialty
  - e. Hospital-based
  - f. Community-based
  - g. Academic
  - h. Other: \_\_\_\_\_
39. What type of facility do you primarily practice in?
  - a. Inpatient
  - b. Outpatient
  - c. Both
